# Supplementary material for: Strategies to Prevent Cholera Introduction during International Personnel Deployments: A Computational Modeling Analysis Based on the 2010 Haiti Outbreak
Source: PLOS journal article supplement (doi:10.1371/journal.pmed.1001947), 2016-01-26
Supplement: S3 (10.1371/journal.pmed.1001947.s003) [file journal.pmed.1001947.s003]

**S3 Table. Status quo importation probabilities by number of infected arrivals.**

| Incidence rate | Any infected arrival            | 1 infected arrival              |                          | 2 infected arrivals                                           |                          | 3 infected arrivals                                           |                                                               | More than 3 infected arrivals                                  |
|----------------|---------------------------------|---------------------------------|--------------------------|---------------------------------------------------------------|--------------------------|---------------------------------------------------------------|---------------------------------------------------------------|----------------------------------------------------------------|
|                | <u>Absolute (%)<sup>a</sup></u> | <u>Absolute (%)<sup>a</sup></u> | <u>w (%)<sup>a</sup></u> | <u>Absolute (%)<sup>a</sup></u>                               | <u>w (%)<sup>a</sup></u> | <u>Absolute (%)<sup>a</sup></u>                               | <u>w (%)<sup>a</sup></u>                                      | <u>Absolute (%)<sup>a</sup></u>                                |
| 0.5/1000 PYAR  | 0.8 (0.4, 1.6)                  | 0.8 (0.4, 1.5)                  | 99.6 (99.2, 99.8)        | 3.2e <sup>-3</sup> (6.5e <sup>-4</sup> , 1.2e <sup>-2</sup> ) | 0.4 (0.2, 0.8)           | 8.5e <sup>-6</sup> (7.8e <sup>-7</sup> , 6.2e <sup>-5</sup> ) | 1.1e <sup>-3</sup> (2.2e <sup>-4</sup> , 4.0e <sup>-3</sup> ) | 1.7e <sup>-8</sup> (7.0e <sup>-10</sup> , 2.4e <sup>-7</sup> ) |
| 1.0/1000 PYAR  | 1.6 (0.7, 3.1)                  | 1.6 (0.8, 3.0)                  | 99.2 (98.4, 99.6)        | 1.3e <sup>-2</sup> (2.6e <sup>-3</sup> , 4.7e <sup>-2</sup> ) | 0.8 (0.4, 1.5)           | 6.8e <sup>-5</sup> (6.2e <sup>-6</sup> , 4.9e <sup>-4</sup> ) | 0.4e <sup>-3</sup> (8.6e <sup>-4</sup> , 1.6e <sup>-2</sup> ) | 2.7e <sup>-7</sup> (1.1e <sup>-8</sup> , 3.8e <sup>-6</sup> )  |
| 2.0/1000 PYAR  | 3.2 (1.4, 6.1)                  | 3.1 (1.4, 5.9)                  | 98.4 (96.9, 99.3)        | 5.0e <sup>-2</sup> (1.0e <sup>-2</sup> , 1.8e <sup>-1</sup> ) | 1.6 (0.7, 3.0)           | 5.3e <sup>-4</sup> (4.9e <sup>-5</sup> , 3.8e <sup>-3</sup> ) | 1.7e <sup>-2</sup> (3.4e <sup>-3</sup> , 6.3e <sup>-2</sup> ) | 4.3e <sup>-6</sup> (1.8e <sup>-7</sup> , 6.0e <sup>-5</sup> )  |
| 5.0/1000 PYAR  | 7.7 (3.6, 14.5)                 | 7.4 (3.5, 13.4)                 | 96.0 (92.4, 98.2)        | 0.3 (0.1–1.0)                                                 | 3.9 (1.8, 7.2)           | 7.9e <sup>-3</sup> (7.6e <sup>-4</sup> , 5.4e <sup>-2</sup> ) | 0.1 (0.0, 0.4)                                                | 1.6e <sup>-4</sup> (6.8e <sup>-6</sup> , 2.2e <sup>-3</sup> )  |
| 10.0/1000 PYAR | 14.8 (7.0, 26.9)                | 13.7 (6.7, 22.9)                | 92.2 (85.3, 96.4)        | 1.1 (0.2–3.6)                                                 | 7.4 (3.5, 13.3)          | 0.1 (0.0, 0.4)                                                | 0.4 (0.1, 1.4)                                                | 2.4e <sup>-3</sup> (1.1e <sup>-4</sup> , 3.1e <sup>-2</sup> )  |

PYAR: person-years at risk (incidence rate denominator).

<sup>a</sup>Notation: 3.2e<sup>-3</sup> = (3.2)10<sup>-3</sup>. Probabilities are presented as median (95% CrI) as inferred from the Binomial distributions inputting status quo importation probabilities from S3 Table.
