# Supplementary material for: Strategies to Prevent Cholera Introduction during International Personnel Deployments: A Computational Modeling Analysis Based on the 2010 Haiti Outbreak
Source: PLOS journal article supplement (doi:10.1371/journal.pmed.1001947), 2016-01-26
Supplement: S4 (10.1371/journal.pmed.1001947.s004) [file journal.pmed.1001947.s004]

**S4 Table. Sensitivity analysis: reductions in case probability with varying RDT performance.**

| Background cholera incidence rate | Reduction in importation/case probability (%) <sup>a,b</sup> |          |          |          |          |          |          |
|-----------------------------------|--------------------------------------------------------------|----------|----------|----------|----------|----------|----------|
|                                   | Sensitivity, specificity                                     |          |          |          |          |          |          |
|                                   | 99%, 99%                                                     | 95%, 95% | 90%, 90% | 80%, 80% | 70%, 70% | 60%, 60% | 50%, 50% |
| 0.5/1000 PYAR                     | 83.2                                                         | 80.5     | 77.1     | 70.3     | 63.5     | 56.7     | 49.9     |
| 1.0/1000 PYAR                     | 83.1                                                         | 80.4     | 77.0     | 70.2     | 63.4     | 56.6     | 49.8     |
| 2.0/1000 PYAR                     | 83.0                                                         | 80.3     | 76.9     | 70.1     | 63.3     | 56.5     | 49.7     |
| 5.0/1000 PYAR                     | 82.8                                                         | 80.0     | 76.5     | 69.6     | 62.8     | 56.0     | 49.2     |
| 10.0/1000 PYAR                    | 82.3                                                         | 79.5     | 75.9     | 68.9     | 62.0     | 55.1     | 48.3     |

PYAR: person-years at risk (incidence rate denominator).

<sup>a</sup>Values reported in table are the proportional reduction in the probability of any infected peacekeeper for sensitivity and specificity inputs in the formula presented in S1 Text §2.2.

<sup>b</sup>Reductions in importation probability are equivalent to reductions in case probability for screening interventions.
