# Supplementary material for: Strategies to Prevent Cholera Introduction during International Personnel Deployments: A Computational Modeling Analysis Based on the 2010 Haiti Outbreak
Source: PLOS journal article supplement (doi:10.1371/journal.pmed.1001947), 2016-01-26
Supplement: S5 (10.1371/journal.pmed.1001947.s005) [file journal.pmed.1001947.s005]

**S5 Table. Sensitivity analysis: false positive tests expected with varying RDT specificity.**

| <b>Specificity</b> | <b>Peacekeepers barred from deployment due to false positive test, <i>n</i> of 454</b> |
|--------------------|----------------------------------------------------------------------------------------|
| 99%                | 4 (1, 9)                                                                               |
| 95%                | 23 (14, 32)                                                                            |
| 90%                | 45 (33, 58)                                                                            |
| 80%                | 91 (74, 108)                                                                           |
| 70%                | 136 (117, 156)                                                                         |
| 60%                | 182 (161, 202)                                                                         |
| 50%                | 227 (206, 248)                                                                         |

Values are reported as median (95% CrI) based on quantiles of the corresponding Binomial distributions (S1 Text §2.2). Expected false positive outcomes did not differ across the range of incidence rates assessed (0.5/1000 PYAR to 10.0/1000 PYAR).
